# Supplementary material for: Fusion of LiDAR and Multispectral Data for Aboveground Biomass Estimation in Mountain Grassland
Source: MDPI journal article supplement (doi:10.3390/rs15020405), 2023-01-09
Supplement: s1 [file s1]

**Table S1.** Validation statistics of vegetation indices.

| Input variables | Model       | R <sup>2</sup> | MAE (g/m <sup>2</sup> ) | RMSE (g/m <sup>2</sup> ) | MPSE (%) |
|-----------------|-------------|----------------|-------------------------|--------------------------|----------|
| EVI2            | Linear      | 0.324          | 245                     | 322                      | 33.4     |
|                 | Power       | 0.323          | 244                     | 323                      | 32.5     |
|                 | Polynomial  | 0.310          | 244                     | 326                      | 33.8     |
|                 | Logarithmic | 0.318          | 249                     | 324                      | 35.5     |
|                 | Exponential | 0.317          | 244                     | 324                      | 32.1     |
| T-EVI2          | Linear      | 0.352          | 240                     | 316                      | 34.4     |
|                 | Power       | 0.353          | 236                     | 316                      | 31.6     |
|                 | Polynomial  | 0.342          | 239                     | 318                      | 32.9     |
|                 | Logarithmic | 0.341          | 245                     | 318                      | 53.1     |
|                 | Exponential | 0.347          | 236                     | 317                      | 31.1     |
| C-EVI2          | Linear      | 0.322          | 247                     | 323                      | 34.1     |
|                 | Power       | 0.320          | 245                     | 324                      | 32.8     |
|                 | Polynomial  | 0.307          | 249                     | 327                      | 34.5     |
|                 | Logarithmic | 0.315          | 251                     | 325                      | 40.4     |
|                 | Exponential | 0.312          | 246                     | 325                      | 32.4     |
| SCS+C-EVI2      | Linear      | 0.339          | 243                     | 319                      | 33.5     |
|                 | Power       | 0.337          | 241                     | 319                      | 32.1     |
|                 | Polynomial  | 0.324          | 244                     | 323                      | 33.4     |
|                 | Logarithmic | 0.331          | 247                     | 321                      | 38.8     |
|                 | Exponential | 0.329          | 242                     | 321                      | 32.8     |
| PLC-EVI2        | Linear      | 0.324          | 245                     | 322                      | 33.4     |
|                 | Power       | 0.323          | 244                     | 323                      | 32.5     |
|                 | Polynomial  | 0.310          | 247                     | 326                      | 33.3     |
|                 | Logarithmic | 0.318          | 249                     | 324                      | 35.5     |
|                 | Exponential | 0.317          | 244                     | 324                      | 32.1     |
| NDVI            | Linear      | 0.322          | 247                     | 323                      | 34.3     |
|                 | Power       | 0.323          | 235                     | 323                      | 32.6     |
|                 | Polynomial  | 0.314          | 246                     | 325                      | 33.0     |
|                 | Logarithmic | 0.315          | 251                     | 325                      | 36.4     |
|                 | Exponential | 0.321          | 244                     | 323                      | 32.3     |
| T-NDVI          | Linear      | 0.348          | 242                     | 317                      | 41.0     |
|                 | Power       | 0.353          | 237                     | 315                      | 31.9     |
|                 | Polynomial  | 0.346          | 238                     | 317                      | 32.3     |
|                 | Logarithmic | 0.336          | 247                     | 320                      | 40.9     |
|                 | Exponential | 0.351          | 236                     | 316                      | 31.3     |

---

|            |             |       |     |     |      |
|------------|-------------|-------|-----|-----|------|
| C-NDVI     | Linear      | 0.320 | 249 | 324 | 35.7 |
|            | Power       | 0.321 | 246 | 323 | 33.0 |
|            | Polynomial  | 0.311 | 248 | 326 | 33.9 |
|            | Logarithmic | 0.312 | 252 | 325 | 53.6 |
|            | Exponential | 0.317 | 245 | 324 | 32.6 |
| SCS+C-NDVI | Linear      | 0.335 | 245 | 320 | 35.1 |
|            | Power       | 0.338 | 241 | 319 | 32.2 |
|            | Polynomial  | 0.328 | 243 | 322 | 33.0 |
|            | Logarithmic | 0.327 | 248 | 322 | 45.7 |
|            | Exponential | 0.334 | 241 | 320 | 31.9 |
| PLC-NDVI   | Linear      | 0.322 | 247 | 323 | 34.3 |
|            | Power       | 0.323 | 244 | 323 | 32.6 |
|            | Polynomial  | 0.314 | 246 | 325 | 33.0 |
|            | Logarithmic | 0.315 | 251 | 325 | 36.4 |
|            | Exponential | 0.321 | 244 | 323 | 32.3 |
| RVI        | Linear      | 0.305 | 244 | 327 | 32.1 |
|            | Power       | 0.304 | 245 | 327 | 32.1 |
|            | Polynomial  | 0.300 | 248 | 329 | 33.4 |
|            | Logarithmic | 0.323 | 244 | 323 | 32.8 |
|            | Exponential | 0.304 | 250 | 328 | 32.7 |
| T-RVI      | Linear      | 0.334 | 237 | 320 | 31.1 |
|            | Power       | 0.334 | 238 | 320 | 31.1 |
|            | Polynomial  | 0.320 | 242 | 324 | 32.6 |
|            | Logarithmic | 0.353 | 238 | 316 | 32.3 |
|            | Exponential | 0.338 | 244 | 320 | 31.8 |
| C-RVI      | Linear      | 0.297 | 246 | 329 | 32.4 |
|            | Power       | 0.297 | 247 | 329 | 32.3 |
|            | Polynomial  | 0.301 | 250 | 329 | 34.1 |
|            | Logarithmic | 0.320 | 246 | 324 | 33.2 |
|            | Exponential | 0.298 | 252 | 329 | 33.0 |
| SCS+C-RVI  | Linear      | 0.316 | 242 | 325 | 31.8 |
|            | Power       | 0.315 | 243 | 325 | 31.8 |
|            | Polynomial  | 0.310 | 247 | 327 | 33.3 |
|            | Logarithmic | 0.337 | 242 | 319 | 32.5 |
|            | Exponential | 0.316 | 249 | 325 | 32.4 |

---

|         |             |       |     |     |      |
|---------|-------------|-------|-----|-----|------|
| PLC-RVI | Linear      | 0.305 | 244 | 327 | 32.1 |
|         | Power       | 0.324 | 245 | 327 | 32.1 |
|         | Polynomial  | 0.300 | 248 | 329 | 33.4 |
|         | Logarithmic | 0.323 | 244 | 323 | 32.8 |
|         | Exponential | 0.304 | 250 | 328 | 32.7 |

**Table S2.** Validation statistics of height metrics.

| Input variables   | Model       | R <sup>2</sup> | MAE (g/m <sup>2</sup> ) | RMSE (g/m <sup>2</sup> ) | MPSE (%) |
|-------------------|-------------|----------------|-------------------------|--------------------------|----------|
| H <sub>mean</sub> | Linear      | 0.167          | 265                     | 364                      | 33.8     |
|                   | Power       | 0.259          | 252                     | 338                      | 32.2     |
|                   | Polynomial  | 0.141          | 264                     | 388                      | 34.0     |
|                   | Logarithmic | 0.316          | 243                     | 324                      | 32.7     |
|                   | Exponential | 0.055          | 301                     | 442                      | 36.8     |
| H <sub>max</sub>  | Linear      | 0.128          | 280                     | 367                      | 36.4     |
|                   | Power       | 0.174          | 269                     | 356                      | 34.9     |
|                   | Polynomial  | 0.237          | 257                     | 343                      | 40.5     |
|                   | Logarithmic | 0.205          | 261                     | 350                      | 34.0     |
|                   | Exponential | 0.095          | 291                     | 373                      | 37.9     |
| H <sub>min</sub>  | Linear      | 0.078          | 302                     | 382                      | 39.4     |
|                   | Power       | 0.127          | 294                     | 367                      | 38.8     |
|                   | Polynomial  | 0.099          | 297                     | 373                      | 39.4     |
|                   | Logarithmic | 0.129          | 296                     | 366                      | 38.9     |
|                   | Exponential | 0.045          | 323                     | 454                      | 39.8     |
| H <sub>p95</sub>  | Linear      | 0.140          | 271                     | 366                      | 35.2     |
|                   | Power       | 0.209          | 258                     | 349                      | 33.2     |
|                   | Polynomial  | 0.033          | 284                     | 471                      | 34.0     |
|                   | Logarithmic | 0.251          | 249                     | 339                      | 32.1     |
|                   | Exponential | 0.067          | 294                     | 395                      | 37.4     |
| H <sub>p90</sub>  | Linear      | 0.146          | 268                     | 368                      | 34.5     |
|                   | Power       | 0.227          | 255                     | 345                      | 32.8     |
|                   | Polynomial  | 0.095          | 271                     | 405                      | 34.6     |
|                   | Logarithmic | 0.279          | 247                     | 333                      | 32.2     |
|                   | Exponential | 0.050          | 302                     | 438                      | 37.2     |
| H <sub>p75</sub>  | Linear      | 0.159          | 264                     | 366                      | 33.7     |
|                   | Power       | 0.250          | 252                     | 340                      | 32.3     |
|                   | Polynomial  | 0.081          | 273                     | 434                      | 33.5     |
|                   | Logarithmic | 0.306          | 245                     | 327                      | 33.0     |

|                  |             |       |     |     |      |
|------------------|-------------|-------|-----|-----|------|
| H <sub>p50</sub> | Exponential | 0.047 | 305 | 467 | 36.8 |
|                  | Linear      | 0.194 | 261 | 356 | 33.6 |
|                  | Power       | 0.282 | 251 | 332 | 32.2 |
|                  | Polynomial  | 0.225 | 257 | 352 | 40.4 |
|                  | Logarithmic | 0.325 | 245 | 322 | 47.7 |
|                  | Exponential | 0.081 | 289 | 403 | 36.2 |
| H <sub>p25</sub> | Linear      | 0.156 | 273 | 368 | 34.9 |
|                  | Power       | 0.275 | 254 | 334 | 32.5 |
|                  | Polynomial  | 0.250 | 260 | 363 | 33.1 |
|                  | Logarithmic | 0.323 | 247 | 323 | 34.0 |
|                  | Exponential | 0.055 | 301 | 437 | 37.1 |
| H <sub>p10</sub> | Linear      | 0.136 | 280 | 373 | 35.7 |
|                  | Power       | 0.275 | 255 | 334 | 32.5 |
|                  | Polynomial  | 0.299 | 247 | 330 | 35.1 |
|                  | Logarithmic | 0.320 | 248 | 323 | 33.1 |
|                  | Exponential | 0.051 | 305 | 433 | 37.6 |
| H <sub>p5</sub>  | Linear      | 0.112 | 284 | 383 | 36.3 |
|                  | Power       | 0.270 | 251 | 335 | 32.3 |
|                  | Polynomial  | 0.032 | 288 | 528 | 33.4 |
|                  | Logarithmic | 0.316 | 243 | 324 | 31.8 |
|                  | Exponential | 0.040 | 312 | 460 | 38.0 |
| H <sub>sd</sub>  | Linear      | 0.126 | 275 | 368 | 36.0 |
|                  | Power       | 0.179 | 264 | 355 | 34.4 |
|                  | Polynomial  | 0.106 | 293 | 498 | 34.2 |
|                  | Logarithmic | 0.215 | 256 | 348 | 33.2 |
|                  | Exponential | 0.080 | 290 | 379 | 37.6 |
| H <sub>cv</sub>  | Linear      | 0.060 | 301 | 381 | 39.9 |
|                  | Power       | 0.084 | 295 | 376 | 38.6 |
|                  | Polynomial  | 0.079 | 298 | 378 | 39.2 |
|                  | Logarithmic | 0.074 | 297 | 378 | 38.9 |
|                  | Exponential | 0.073 | 298 | 379 | 39.2 |

**Table S3.** Validation statistics of intensity metrics.

| Input variables   | Model       | R <sup>2</sup> | MAE (g/m <sup>2</sup> ) | RMSE (g/m <sup>2</sup> ) | MPSE (%) |
|-------------------|-------------|----------------|-------------------------|--------------------------|----------|
| I <sub>mean</sub> | Linear      | 0.246          | 275                     | 341                      | 38.3     |
|                   | Power       | 0.227          | 276                     | 345                      | 35.9     |
|                   | Polynomial  | 0.245          | 270                     | 341                      | 35.6     |
|                   | Logarithmic | 0.246          | 271                     | 341                      | 35.3     |
|                   | Exponential | 0.249          | 269                     | 340                      | 35.1     |
| I <sub>max</sub>  | Linear      | 0.271          | 272                     | 335                      | 38.2     |
|                   | Power       | 0.253          | 271                     | 339                      | 35.1     |
|                   | Polynomial  | 0.274          | 266                     | 334                      | 34.9     |
|                   | Logarithmic | 0.275          | 266                     | 334                      | 34.7     |
|                   | Exponential | 0.278          | 265                     | 333                      | 34.6     |
| I <sub>min</sub>  | Linear      | 0.194          | 284                     | 352                      | 37.5     |
|                   | Power       | 0.173          | 287                     | 357                      | 37.6     |
|                   | Polynomial  | 0.187          | 284                     | 354                      | 37.3     |
|                   | Logarithmic | 0.190          | 283                     | 353                      | 37.2     |
|                   | Exponential | 0.194          | 282                     | 352                      | 37.0     |
| I <sub>p95</sub>  | Linear      | 0.275          | 271                     | 334                      | 38.3     |
|                   | Power       | 0.250          | 272                     | 340                      | 35.2     |
|                   | Polynomial  | 0.275          | 266                     | 334                      | 35.0     |
|                   | Logarithmic | 0.274          | 266                     | 334                      | 34.6     |
|                   | Exponential | 0.278          | 265                     | 333                      | 34.5     |
| I <sub>p90</sub>  | Linear      | 0.267          | 272                     | 336                      | 38.3     |
|                   | Power       | 0.242          | 272                     | 341                      | 35.2     |
|                   | Polynomial  | 0.266          | 267                     | 336                      | 35.2     |
|                   | Logarithmic | 0.265          | 267                     | 336                      | 34.7     |
|                   | Exponential | 0.269          | 266                     | 335                      | 34.6     |
| I <sub>p75</sub>  | Linear      | 0.248          | 274                     | 340                      | 40.3     |
|                   | Power       | 0.224          | 276                     | 345                      | 35.8     |
|                   | Polynomial  | 0.245          | 271                     | 341                      | 35.9     |
|                   | Logarithmic | 0.245          | 271                     | 341                      | 35.4     |
|                   | Exponential | 0.249          | 270                     | 340                      | 35.2     |
| I <sub>p50</sub>  | Linear      | 0.239          | 275                     | 342                      | 41.0     |
|                   | Power       | 0.226          | 275                     | 345                      | 35.9     |
|                   | Polynomial  | 0.240          | 271                     | 342                      | 35.7     |
|                   | Logarithmic | 0.242          | 271                     | 342                      | 35.5     |
|                   | Exponential | 0.244          | 270                     | 341                      | 35.3     |

---

|                  |             |       |     |     |      |
|------------------|-------------|-------|-----|-----|------|
| I <sub>p25</sub> | Linear      | 0.231 | 278 | 344 | 37.6 |
|                  | Power       | 0.217 | 278 | 347 | 36.5 |
|                  | Polynomial  | 0.228 | 274 | 345 | 36.2 |
|                  | Logarithmic | 0.232 | 274 | 344 | 35.9 |
|                  | Exponential | 0.234 | 273 | 343 | 35.8 |
| I <sub>p10</sub> | Linear      | 0.226 | 279 | 345 | 37.8 |
|                  | Power       | 0.214 | 279 | 348 | 36.6 |
|                  | Polynomial  | 0.224 | 275 | 346 | 36.3 |
|                  | Logarithmic | 0.228 | 275 | 345 | 36.1 |
|                  | Exponential | 0.229 | 274 | 344 | 36.0 |
| I <sub>p5</sub>  | Linear      | 0.224 | 280 | 346 | 37.9 |
|                  | Power       | 0.214 | 279 | 348 | 36.7 |
|                  | Polynomial  | 0.223 | 276 | 346 | 36.4 |
|                  | Logarithmic | 0.227 | 275 | 345 | 36.1 |
|                  | Exponential | 0.228 | 275 | 345 | 36.0 |
| I <sub>sd</sub>  | Linear      | 0.234 | 284 | 343 | 37.3 |
|                  | Power       | 0.210 | 285 | 349 | 36.7 |
|                  | Polynomial  | 0.226 | 284 | 345 | 37.1 |
|                  | Logarithmic | 0.231 | 282 | 344 | 36.7 |
|                  | Exponential | 0.236 | 282 | 343 | 36.8 |
| I <sub>cv</sub>  | Linear      | 0.024 | 312 | 389 | 41.2 |
|                  | Power       | 0.027 | 313 | 388 | 41.5 |
|                  | Polynomial  | 0.021 | 317 | 393 | 42.7 |
|                  | Logarithmic | 0.026 | 314 | 388 | 41.7 |
|                  | Exponential | 0.021 | 312 | 389 | 41.1 |

---
